# Supplementary material
Source: HighWire-hosted journal article supplement (https://bmjopen.bmj.com/content/8/9/e020685)
Supplement: inline-supplementary-material-1 [file inline-supplementary-material-1.pdf]

## Supplementary File 1 – Overview of Mantra Meditation Programme

|                                                                                                                                                                                                                                                                                |                                                                                                                                                                                                                             |
|--------------------------------------------------------------------------------------------------------------------------------------------------------------------------------------------------------------------------------------------------------------------------------|-----------------------------------------------------------------------------------------------------------------------------------------------------------------------------------------------------------------------------|
| <b>Session 1</b>                                                                                                                                                                                                                                                               | <ul style="list-style-type: none"><li>• Introduction to Meditation</li><li>• Physical Preparation for Meditation</li><li>• A Brief History of Meditation Practices</li><li>• Katha Upanishad (Indian Hindu Text)*</li></ul> |
| <b>Session 2</b>                                                                                                                                                                                                                                                               | <ul style="list-style-type: none"><li>• Dealing with Distractions</li><li>• Evaluations</li><li>• Developing the Practice</li><li>• Tao Te Ching – Lao Tzu (Chinese Taoist Text)*</li></ul>                                 |
| <b>Session 3</b>                                                                                                                                                                                                                                                               | <ul style="list-style-type: none"><li>• Being and Doing</li><li>• Attention</li><li>• Martha and Mary, Gospel of Luke (Christian Text)*</li></ul>                                                                           |
| <b>Session 4</b>                                                                                                                                                                                                                                                               | <ul style="list-style-type: none"><li>• Stages of Mantra Meditation</li><li>• Levels of Consciousness</li><li>• Health and Meditation</li><li>• Parable of the Mustard Seed (Buddhist Text)*</li></ul>                      |
| <p><i>*The purpose of the texts in the context of this programme was to experience reading a contemplative text and consider its significance in your life, to explore the concepts of stillness and 'being', and to understand meditation in relation to these texts.</i></p> |                                                                                                                                                                                                                             |
